# Supplementary material for: Organosilicon Compounds, SILA-409 and SILA-421, as Doxorubicin Resistance-Reversing Agents in Human Colon Cancer Cells
Source: MDPI journal article supplement (doi:10.3390/molecules25071654), 2020-04-03
Supplement: s1 [file s1]

## Supplementary Materials

# Organosilicon compounds, SILA-409 and SILA-421, as doxorubicin resistance-reversing agents in human colon cancer cells

Olga Wesołowska <sup>1,\*</sup>, Krystyna Michalak <sup>1</sup>, Maria Błaszczuk <sup>1</sup>, Joseph Molnár <sup>2</sup> and Kamila Środa-Pomianek <sup>1</sup>

<sup>1</sup> Department of Biophysics and Neuroscience, Wrocław Medical University, Poland

<sup>2</sup> Institute of Medical Microbiology and Immunobiology, University of Szeged, Hungary

\* Correspondence: olga.wesolowska@umed.wroc.pl; Tel.: +48-71-784-14-15

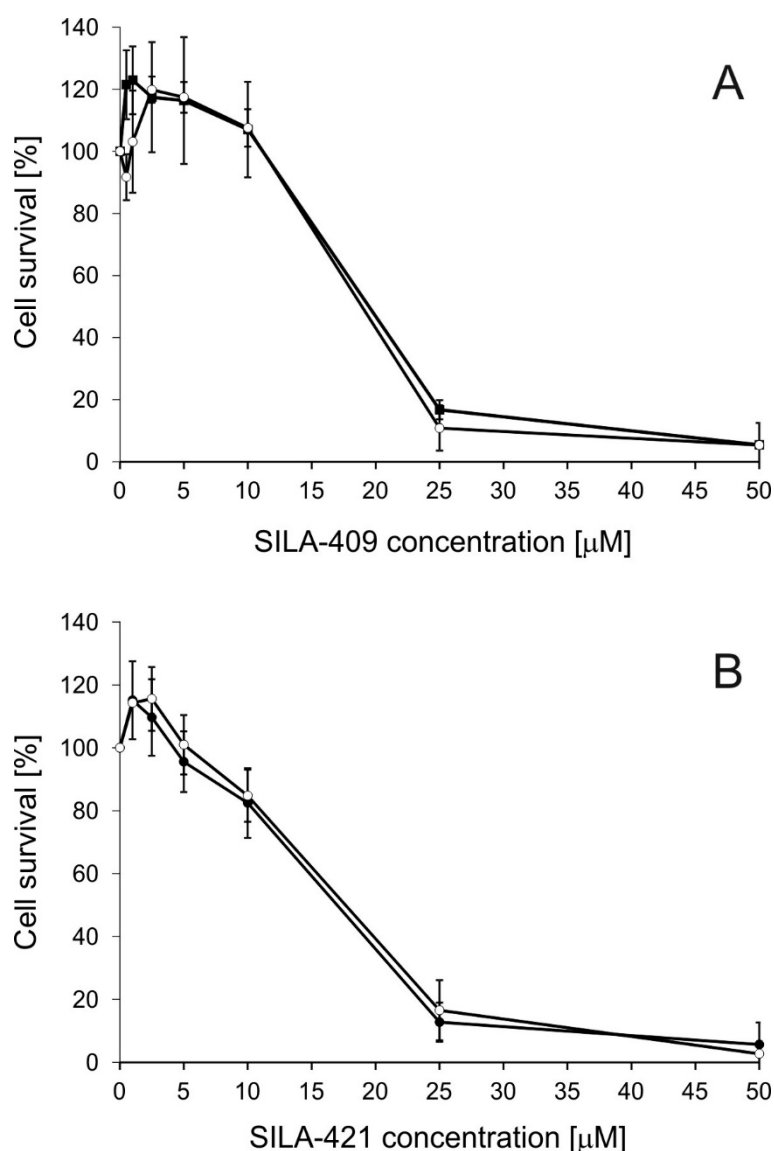

**Figure S1.** Cytotoxicity of SILA-409 (A) and SILA-421 (B) to MDCK (full symbols) and MDCK-MDR1 cells (open symbols). Means of three experiments  $\pm$  SD are presented.

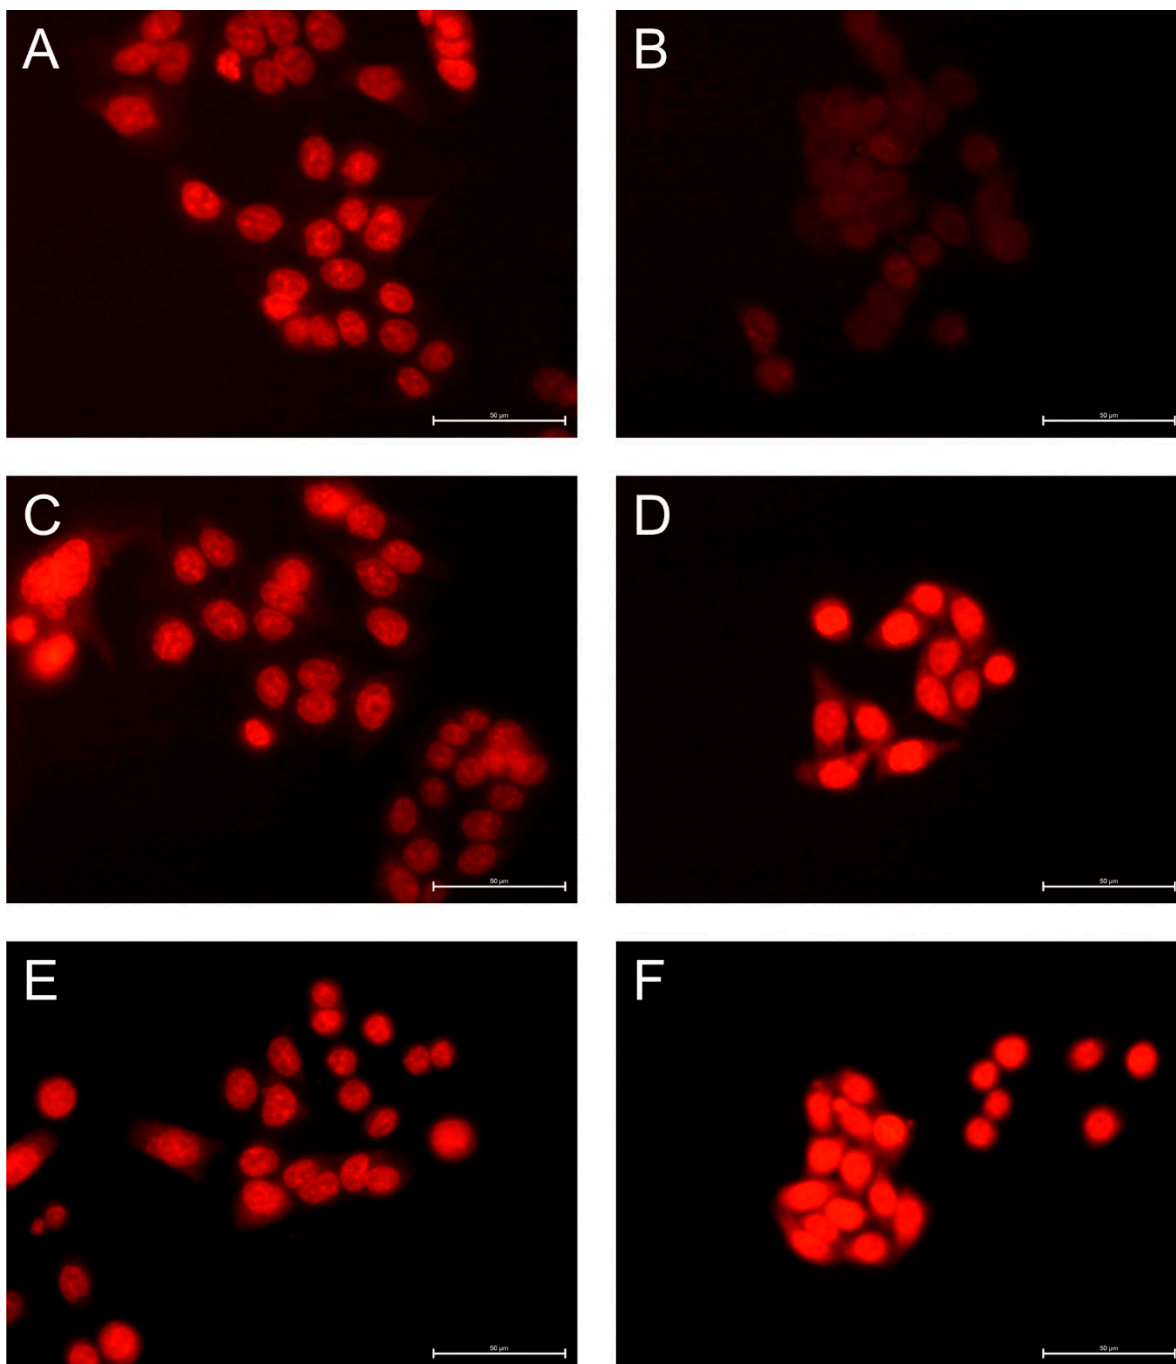

**Figure S2.** Fluorescence microscopy images illustrating doxorubicin accumulation in LoVo (**A**) and LoVo/Dx (**B**) cells treated with 5  $\mu$ M SILA-409 (**C** and **D** for LoVo and LoVo/Dx, respectively) and with 5  $\mu$ M SILA-421 (**E** and **F**). Scale bar is 50  $\mu$ m. Illumination conditions were the same for all images.

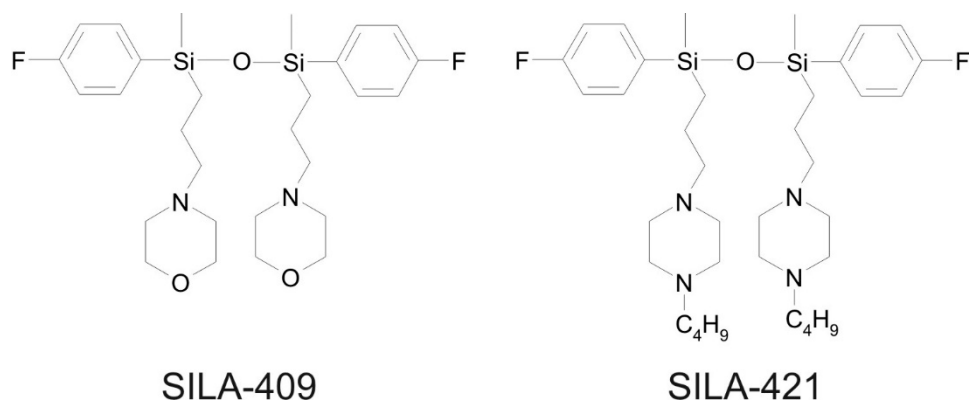

**Figure S3.** Chemical structures of SILA-409 and SILA-421.
